# Supplementary material for: Converting waste textiles into highly effective sorbent materials
Source: Royal Society of Chemistry journal article supplement (doi:10.1039/d0ra04616g), 2020-01-01
Supplement: d0ra04616g1.pdf [file d0ra04616g1.pdf]

## Converting waste textiles into highly effective sorbent materials

Nolene Byrne,\* and Bijan Nasri-Nasrabadi

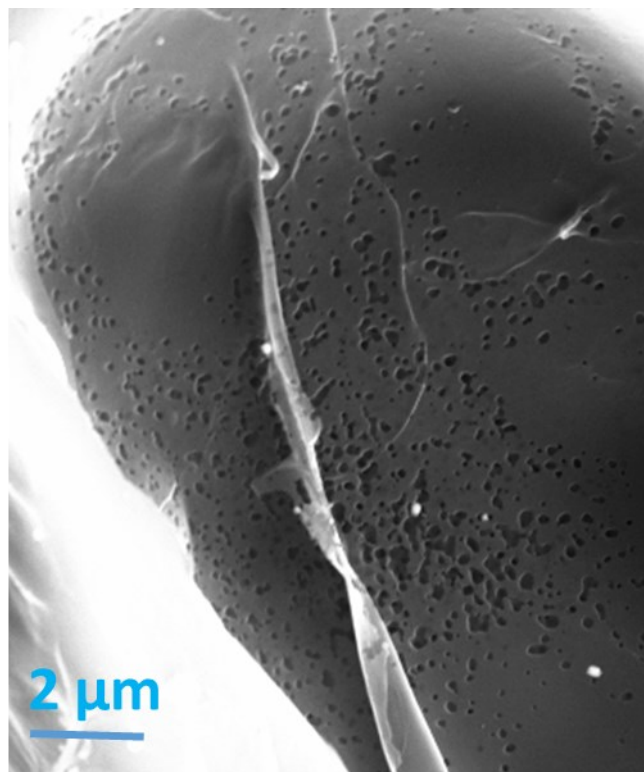

**Fig. S1** SEM image of the activated freeze dried carbon fibre (inner surface area).

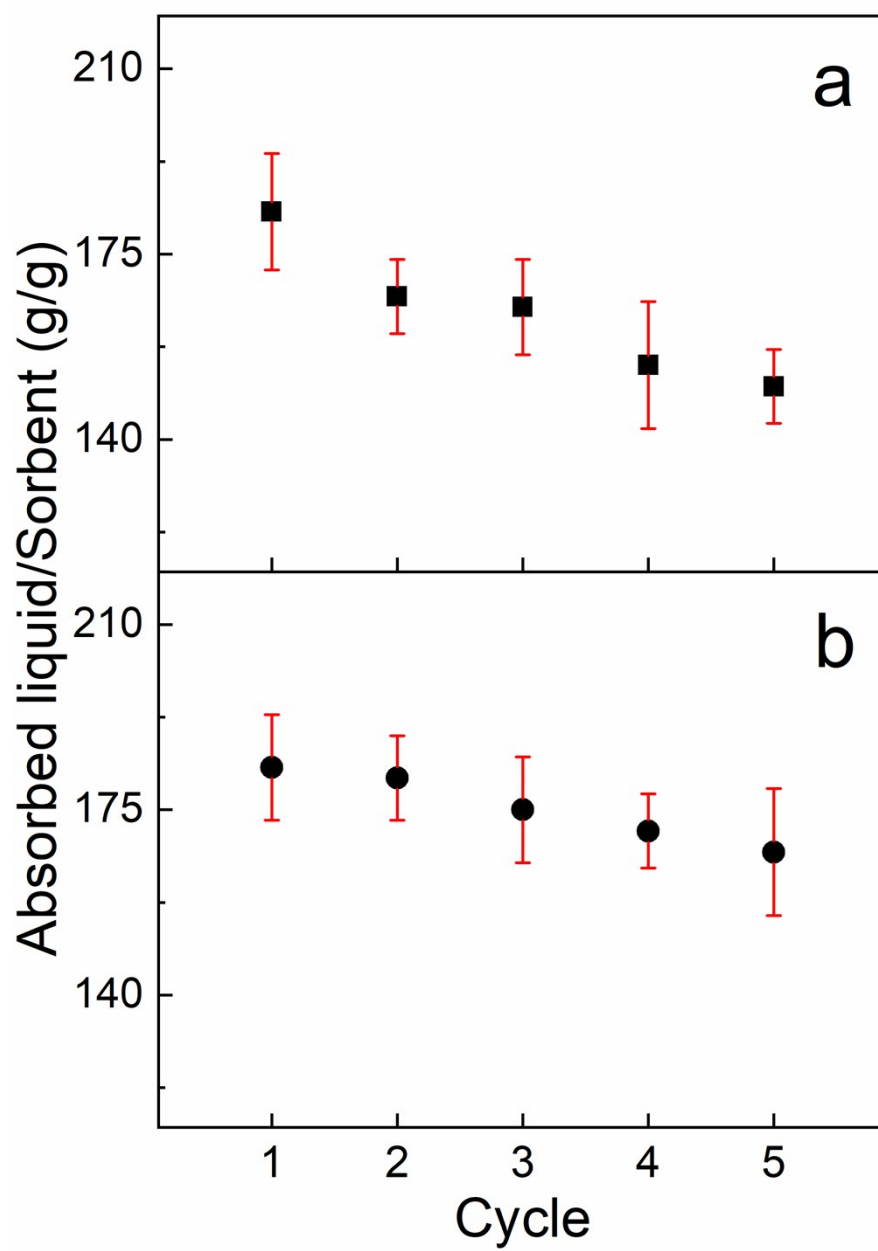

**Fig. S2** (a) Absorption/combustion recyclability of the AFDCF with gasoline. (b) Absorption/distillation recyclability of the AFDCF with gasoline.

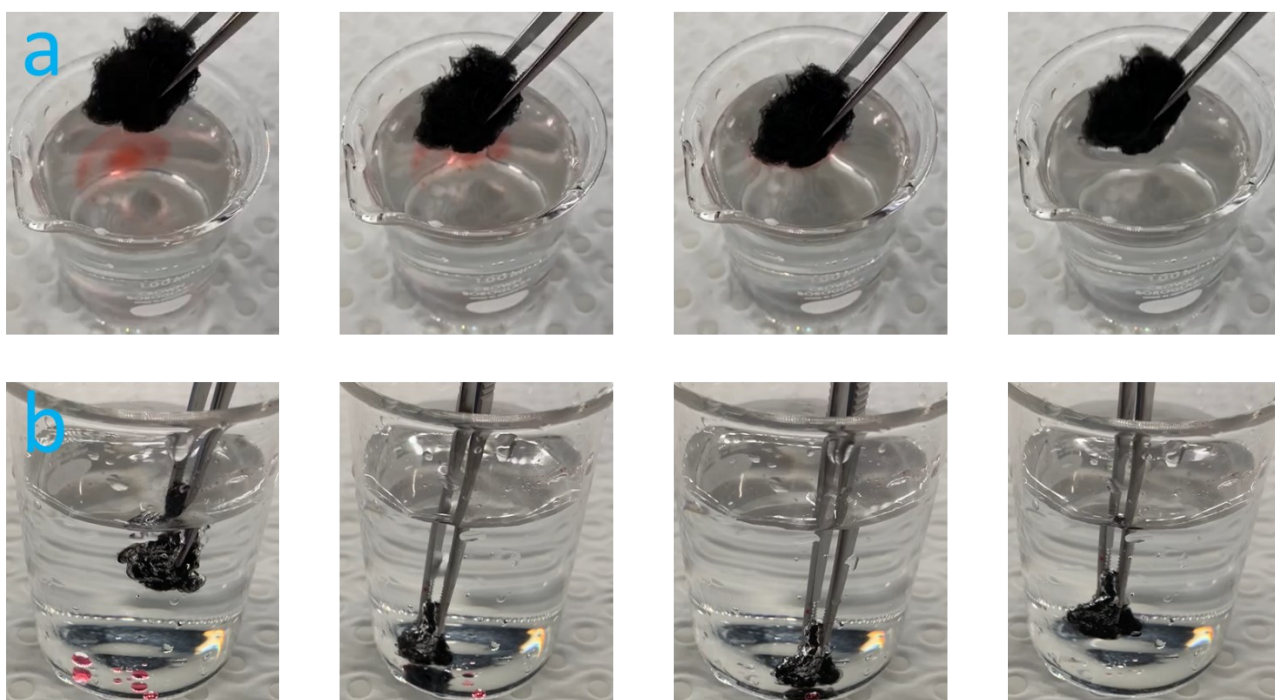

**Figure S3.** FDFCA1100 sample absorption of **A)** heptane (stained red) from water surface and **b)** chloroform (stained red) from water showing instant absorption on contact.

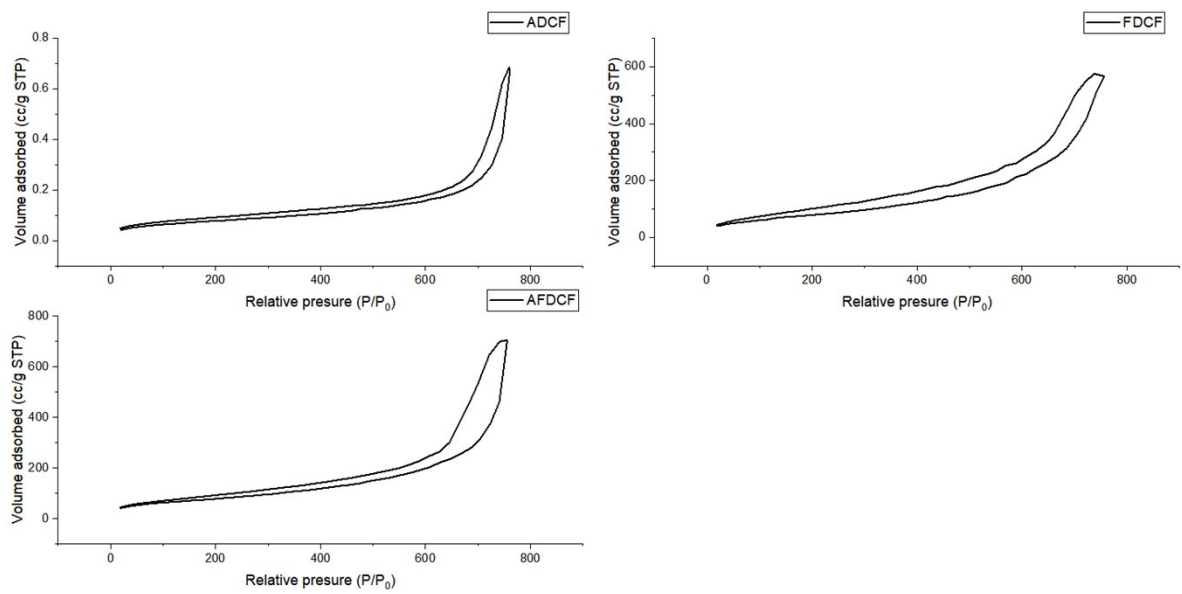

**Figure S4.** Nitrogen adsorption isotherms of carbon fibres.

*ADCF: Air dried carbon fibres, FDCF: Freeze dried carbon fibres, and AFDCF: CO<sub>2</sub>-Activated freeze dried carbon fibres.*
